# Supplementary material for: COVID‐19 among adults living with HIV: correlates of mortality among public sector healthcare users in Western Cape, South Africa
Source: PubMed Central journal article supplement (PMC10281639; doi:10.1002/jia2.26104), 2023-06-20
Supplement: JIA2-26-e26104-s001.pdf [file JIA2-26-e26104-s001.pdf]

# Supplemental Digital Content

## Additional analysis outputs for:

COVID-19 among adults living with HIV: Correlates of mortality among public sector healthcare users in Western Cape, South Africa

Reshma Kassanjee<sup>1§</sup>, Mary-Ann Davies<sup>1,2</sup>, Olina Ngwenya<sup>3</sup>, Richard Osei-Yeboah<sup>4</sup>, Theuns Jacobs<sup>1,2</sup>, Erna Morden<sup>1,2</sup>, Venessa Timmerman<sup>2</sup>, Stefan Britz<sup>5</sup>, Marc Mendelson<sup>6</sup>, Jantjie Taljaard<sup>7</sup>, Julien Riou<sup>8</sup>, Andrew Boule<sup>1,2</sup>, Nicki Tiffin<sup>2,9</sup>, Nesbert Zinyakatira<sup>1,2</sup>

- 1 School of Public Health, University of Cape Town, Cape Town, South Africa
- 2 Western Cape Government: Health and Wellness, Cape Town, South Africa
- 3 Wellcome Centre for Infectious Disease Research in Africa, Institute of Infectious Diseases and Molecular Medicine, University of Cape Town, Cape Town, South Africa
- 4 Division of Computational Biology, Integrative Biomedical Sciences Department, Faculty of Health Sciences, University of Cape Town, Cape Town, South Africa
- 5 Department of Statistical Sciences, University of Cape Town, Cape Town, South Africa
- 6 Division of Infectious Diseases and HIV Medicine, Department of Medicine, Groote Schuur Hospital, University of Cape Town, South Africa
- 7 Division of Infectious Diseases, Department of Medicine, Tygerberg Hospital, Stellenbosch University, South Africa
- 8 Institute of Social and Preventive Medicine, University of Bern, Bern, Switzerland
- 9 University of the Western Cape, Cape Town, South Africa

§ Corresponding author: Reshma Kassanjee  
Reshma.Kassanjee@uct.ac.za

---

|                                                                                            |    |
|--------------------------------------------------------------------------------------------|----|
| A: Additional descriptions of SARS-CoV-2 infections                                        | 2  |
| B: Unadjusted and adjusted odds ratios for all model terms                                 | 3  |
| C: Adjusted odds ratios using alternative CD4 cell counts measures                         | 7  |
| D: Adjusted odds ratios for models including SARS-CoV-2 infections diagnosed during Wave 4 | 11 |

---

# Supplemental Digital Content A: Additional descriptions of SARS-CoV-2 infections

**Table A1: Admission pressure, timing and location for SARS-CoV-2 infections among adults with HIV in the Western Cape, stratified by age group (percentages and counts)**

| Characteristic                            | Cases until end of Wave 3     |                             |                        | All cases (including Wave 4) |
|-------------------------------------------|-------------------------------|-----------------------------|------------------------|------------------------------|
|                                           | Ages 15-39 years<br>n = 9,321 | Ages ≥40 years<br>n = 8,799 | All ages<br>n = 18,120 | All ages<br>n = 22,057       |
| <b>Admission pressure<sup>1</sup> (%)</b> |                               |                             |                        |                              |
| <25                                       | 28.7 (2,674)                  | 23.5 (2,070)                | 26.2 (4,744)           | 29.2 (6,432)                 |
| ≥25 and <50                               | 34.1 (3,181)                  | 36.5 (3,208)                | 35.3 (6,389)           | 37.8 (8,346)                 |
| ≥50                                       | 37.2 (3,466)                  | 40.0 (3,521)                | 38.6 (6,987)           | 33.0 (7,279)                 |
| <b>Wave</b>                               |                               |                             |                        |                              |
| Wave 1                                    | 32.7 (3,052)                  | 31.0 (2,731)                | 31.9 (5,783)           | 26.2 (5,783)                 |
| Wave 2                                    | 26.5 (2,469)                  | 28.8 (2,532)                | 27.6 (5,001)           | 22.7 (5,001)                 |
| Wave 3                                    | 29.3 (2,731)                  | 31.2 (2,747)                | 30.2 (5,478)           | 24.8 (5,478)                 |
| Wave 4                                    | -                             | -                           | -                      | 15.6 (3,430)                 |
| Inter-waves                               | 11.5 (1,069)                  | 9.0 (789)                   | 10.3 (1,858)           | 10.7 (2,365)                 |
| <b>District</b>                           |                               |                             |                        |                              |
| Cape Winelands                            | 9.8 (915)                     | 10.8 (950)                  | 10.3 (1,865)           | 10.2 (2,253)                 |
| Central Karoo                             | 1.1 (106)                     | 1.4 (124)                   | 1.3 (230)              | 1.3 (277)                    |
| City of Cape Town                         | 61.1 (5,698)                  | 62.7 (5,518)                | 61.9 (11,216)          | 62.1 (13,707)                |
| Garden Route                              | 18.0 (1,677)                  | 16.1 (1,416)                | 17.1 (3,093)           | 17.2 (3,792)                 |
| Overberg                                  | 5.2 (489)                     | 4.3 (379)                   | 4.8 (868)              | 4.6 (1,009)                  |
| West Coast                                | 4.7 (436)                     | 4.7 (412)                   | 4.7 (848)              | 4.6 (1,019)                  |

<sup>1</sup> The week's total number of COVID-19 admissions relative to the maximum weekly COVID-19 admissions for that district (as a percent).

**Table A2: Alternative CD4 cell count measures for SARS-CoV-2 infections among adults with HIV in the Western Cape, stratified by age group (percentages and counts)**

| CD4 count (cells/μl) measure | Cases until end of Wave 3     |                             |                        | All cases (including Wave 4) |
|------------------------------|-------------------------------|-----------------------------|------------------------|------------------------------|
|                              | Ages 15-39 years<br>n = 9,321 | Ages ≥40 years<br>n = 8,799 | All ages<br>n = 18,120 | All ages<br>n = 22,057       |
| <b>Recent</b>                |                               |                             |                        |                              |
| ≥ 500                        | 14.0 (1,304)                  | 11.3 (991)                  | 12.7 (2,295)           | 12.6 (2,775)                 |
| 200-499                      | 15.7 (1,465)                  | 11.5 (1,014)                | 13.7 (2,479)           | 13.5 (2,986)                 |
| 50-199                       | 7.0 (648)                     | 5.8 (511)                   | 6.4 (1,159)            | 7.1 (1,576)                  |
| 0-49                         | 3.6 (333)                     | 2.2 (191)                   | 2.9 (524)              | 3.5 (773)                    |
| Unknown                      | 59.8 (5,571)                  | 69.2 (6,092)                | 64.4 (11,663)          | 63.2 (13,947)                |
| <b>Nadir</b>                 |                               |                             |                        |                              |
| ≥ 500                        | 15.3 (1,424)                  | 12.1 (1,067)                | 13.7 (2,491)           | 13.4 (2,965)                 |
| 200-499                      | 44.1 (4,109)                  | 39.2 (3,446)                | 41.7 (7,555)           | 40.7 (8,986)                 |
| 50-199                       | 21.3 (1,987)                  | 28.7 (2,526)                | 24.9 (4,513)           | 25.1 (5,535)                 |
| 0-49                         | 8.0 (743)                     | 10.1 (886)                  | 9.0 (1,629)            | 9.6 (2,112)                  |
| Unknown                      | 11.4 (1,058)                  | 9.9 (874)                   | 10.7 (1,932)           | 11.1 (2,459)                 |
| <b>At ART initiation</b>     |                               |                             |                        |                              |
| ≥ 500                        | 11.9 (1,105)                  | 7.2 (631)                   | 9.6 (1,736)            | 9.6 (2,111)                  |
| 200-499                      | 34.0 (3,166)                  | 25.5 (2,245)                | 29.9 (5,411)           | 29.8 (6,572)                 |
| 50-199                       | 14.9 (1,387)                  | 19.9 (1,752)                | 17.3 (3,139)           | 17.3 (3,813)                 |
| 0-49                         | 3.8 (358)                     | 5.4 (477)                   | 4.6 (835)              | 4.7 (1,027)                  |
| Unknown                      | 35.5 (3,305)                  | 42.0 (3,694)                | 38.6 (6,999)           | 38.7 (8,534)                 |

## Supplemental Digital Content B: Unadjusted and adjusted odds ratios for all model terms

**Table B1: Mortality rates, unadjusted and adjusted odds ratios (and 95% CIs) describing the association of mortality with a person's demographic characteristics, co-existing conditions, vaccination status, HIV characteristics and time/location covariates, for 15–39-year-old adults with HIV and SARS-CoV-2 infections in the Western Cape**

| Variable                                | Category     | n    | Mortality risk<br>(95% CI) | Univariable analysis: Unadjusted odds ratio (uOR) |         | Multivariable analysis: Adjusted odds ratio (aOR) |         |
|-----------------------------------------|--------------|------|----------------------------|---------------------------------------------------|---------|---------------------------------------------------|---------|
|                                         |              |      |                            | Estimate<br>(95% CI)                              | p-value | Estimate<br>(95% CI)                              | p-value |
| Sex                                     | Female (Ref) | 7114 | 2.52 (2.16,2.91)           | -                                                 | <0.001  |                                                   | 0.656   |
|                                         | Male         | 2032 | 4.13 (3.31,5.09)           | 1.67 (1.28,2.17)                                  |         | 1.07 (0.80,1.42)                                  |         |
| Age group (years)                       | 15-24 (Ref)  | 884  | 2.26 (1.39,3.47)           | -                                                 | 0.001   |                                                   | 0.003   |
|                                         | 25-29        | 1973 | 2.13 (1.54,2.87)           | 0.94 (0.56,1.64)                                  |         | 1.21 (0.70,2.17)                                  |         |
|                                         | 30-34        | 3008 | 2.56 (2.03,3.19)           | 1.13 (0.70,1.92)                                  |         | 1.37 (0.83,2.38)                                  |         |
|                                         | 35-39        | 3281 | 3.78 (3.15,4.49)           | 1.70 (1.08,2.82)                                  |         | 2.05 (1.25,3.51)                                  |         |
| Hypertension                            | Absent (Ref) | 8360 | 2.75 (2.41,3.12)           | -                                                 | 0.029   |                                                   | 0.019   |
|                                         | Present      | 786  | 4.20 (2.91,5.85)           | 1.55 (1.05,2.22)                                  |         | 1.68 (1.07,2.55)                                  |         |
| Diabetes                                | Absent (Ref) | 8789 | 2.74 (2.41,3.11)           | -                                                 | 0.001   |                                                   | <0.001  |
|                                         | Present      | 357  | 6.16 (3.90,9.18)           | 2.33 (1.45,3.57)                                  |         | 2.64 (1.54,4.33)                                  |         |
| Chronic obstructive pulmonary disease   | Absent (Ref) | 8776 | 2.83 (2.49,3.19)           | -                                                 | 0.19    |                                                   | 0.643   |
|                                         | Present      | 370  | 4.05 (2.29,6.60)           | 1.45 (0.82,2.39)                                  |         | 1.15 (0.62,1.98)                                  |         |
| Chronic kidney disease                  | Absent (Ref) | 9062 | 2.74 (2.41,3.09)           | -                                                 | <0.001  |                                                   | <0.001  |
|                                         | Present      | 84   | 17.86 (10.35,27.74)        | 7.73 (4.20,13.32)                                 |         | 5.85 (2.93,11.06)                                 |         |
| Tuberculosis <sup>1</sup> (years since) | Absent (Ref) | 6708 | 1.46 (1.19,1.78)           | -                                                 | <0.001  |                                                   | <0.001  |
|                                         | ≥ 1          | 1644 | 2.98 (2.21,3.92)           | 2.07 (1.45,2.92)                                  |         | 1.73 (1.19,2.49)                                  |         |
|                                         | < 1          | 319  | 13.17 (9.66,17.38)         | 10.23 (6.93,14.87)                                |         | 5.40 (3.43,8.41)                                  |         |
|                                         | Ongoing      | 475  | 15.58 (12.44,19.16)        | 12.45 (9.03,17.09)                                |         | 7.40 (5.12,10.67)                                 |         |
| Number of conditions <sup>2</sup>       | 0-2 (Ref)    | 9076 | 2.81 (2.48,3.17)           | -                                                 | 0.001   |                                                   | 0.334   |
|                                         | >2           | 70   | 11.43 (5.07,21.28)         | 4.46 (1.96,8.88)                                  |         | 0.62 (0.22,1.60)                                  |         |
| Pregnancy                               | Absent (Ref) | 8381 | 2.97 (2.62,3.36)           | -                                                 | 0.054   |                                                   | 0.842   |
|                                         | Present      | 765  | 1.83 (1.00,3.05)           | 0.61 (0.34,1.01)                                  |         | 0.94 (0.51,1.63)                                  |         |

Continued on next page

Table B1 continued

| Variable                            | Category                | n    | Mortality risk<br>(95% CI) | Univariable analysis: Unadjusted odds ratio (uOR) |         | Multivariable analysis: Adjusted odds ratio (aOR) |         |
|-------------------------------------|-------------------------|------|----------------------------|---------------------------------------------------|---------|---------------------------------------------------|---------|
|                                     |                         |      |                            | Estimate<br>(95% CI)                              | p-value | Estimate<br>(95% CI)                              | p-value |
| Vaccination status <sup>3</sup>     | None (Ref)              | 8967 | 2.90 (2.56,3.27)           |                                                   | 0.032   |                                                   | 0.081   |
|                                     | Early                   | 69   | 4.35 (0.91,12.18)          | 1.52 (0.37,4.13)                                  |         | 1.31 (0.31,3.80)                                  |         |
|                                     | 1/2 vaccines            | 110  | 0.00 (0.00,3.30)           | 0.00 (no deaths)                                  |         | 0.00 (0.00,0.29)                                  |         |
| CD4 count (cells/ul)                | ≥ 500 (Ref)             | 1280 | 1.48 (0.90,2.31)           | -                                                 | <0.001  |                                                   | <0.001  |
|                                     | 200-499                 | 1441 | 2.50 (1.76,3.44)           | 1.70 (0.98,3.04)                                  |         | 1.19 (0.67,2.17)                                  |         |
|                                     | 50-199                  | 631  | 7.77 (5.80,10.14)          | 5.59 (3.32,9.80)                                  |         | 2.20 (1.23,4.04)                                  |         |
|                                     | 0-49                    | 318  | 14.78 (11.07,19.17)        | 11.51 (6.76,20.38)                                |         | 3.39 (1.83,6.47)                                  |         |
|                                     | Unknown                 | 5476 | 2.05 (1.69,2.46)           | 1.39 (0.87,2.33)                                  |         | 1.05 (0.64,1.80)                                  |         |
| Viral load <sup>4</sup> (copies/ml) | 0-999 (Ref)             | 5546 | 1.77 (1.44,2.15)           | -                                                 | <0.001  |                                                   | 0.092   |
|                                     | ≥ 1000                  | 892  | 7.06 (5.47,8.95)           | 4.22 (3.04,5.83)                                  |         | 1.53 (1.03,2.24)                                  |         |
|                                     | Unknown                 | 1896 | 3.01 (2.28,3.88)           | 1.72 (1.23,2.39)                                  |         | 1.26 (0.88,1.81)                                  |         |
| ART collection                      | Yes                     | 8334 | 2.62 (2.28,2.98)           | -                                                 | <0.001  |                                                   | <0.001  |
|                                     | No ART                  | 812  | 5.54 (4.07,7.35)           | 2.18 (1.55,3.01)                                  |         | 2.30 (1.47,3.54)                                  |         |
| HIV (years since first evidence)    | ≥ 1 (Ref)               | 8322 | 2.66 (2.32,3.02)           | -                                                 | <0.001  |                                                   | 0.126   |
|                                     | < 1                     | 824  | 5.10 (3.70,6.83)           | 1.97 (1.39,2.73)                                  |         | 1.37 (0.91,2.05)                                  |         |
| Admission pressure <sup>5</sup> (%) | <25 (Ref)               | 2630 | 2.78 (2.18,3.48)           | -                                                 | 0.3     |                                                   | 0.036   |
|                                     | ≥25 and <50             | 3147 | 3.24 (2.65,3.92)           | 1.17 (0.87,1.60)                                  |         | 1.65 (1.11,2.49)                                  |         |
|                                     | ≥50                     | 3369 | 2.61 (2.10,3.21)           | 0.94 (0.69,1.29)                                  |         | 1.24 (0.79,2.00)                                  |         |
| Wave                                | Wave 1 (Ref)            | 3052 | 2.23 (1.73,2.82)           | -                                                 | 0.008   |                                                   | 0.022   |
|                                     | Wave 2                  | 2415 | 2.61 (2.01,3.33)           | 1.18 (0.83,1.66)                                  |         | 1.29 (0.82,2.01)                                  |         |
|                                     | Wave 3                  | 2636 | 3.57 (2.89,4.35)           | 1.62 (1.18,2.23)                                  |         | 1.68 (1.13,2.50)                                  |         |
|                                     | Inter-waves             | 1043 | 3.64 (2.59,4.97)           | 1.66 (1.10,2.47)                                  |         | 1.83 (1.08,3.11)                                  |         |
| District                            | City of Cape Town (Ref) | 5599 | 2.82 (2.40,3.29)           | -                                                 | 0.209   |                                                   | 0.136   |
|                                     | Cape Winelands          | 907  | 4.08 (2.89,5.58)           | 1.46 (1.00,2.09)                                  |         | 1.70 (1.12,2.52)                                  |         |
|                                     | Central Karoo           | 104  | 1.92 (0.23,6.77)           | 0.68 (0.11,2.16)                                  |         | 0.50 (0.08,1.75)                                  |         |
|                                     | Garden Route            | 1623 | 2.40 (1.71,3.27)           | 0.85 (0.59,1.20)                                  |         | 0.95 (0.64,1.37)                                  |         |
|                                     | Overberg                | 483  | 3.52 (2.06,5.58)           | 1.26 (0.73,2.03)                                  |         | 1.37 (0.76,2.32)                                  |         |
|                                     | West Coast              | 430  | 2.33 (1.12,4.24)           | 0.82 (0.40,1.49)                                  |         | 0.94 (0.45,1.75)                                  |         |

<sup>1</sup> Time since the most recent evidence of a start of an episode; with episodes beginning after 2 months before the SARS-CoV-2 diagnosis considered as ongoing. <sup>2</sup> Hypertension, diabetes, chronic obstructive pulmonary disease, chronic kidney disease, tuberculosis (at any time). <sup>3</sup> The highest level of protection from among: No vaccine received ('None'); <28 days since a first vaccine dose ('Early'); ≥28 days since (at least) a first dose of a vaccine (1 or 2 Pfizer or Janssen vaccines not distinguished due to small samples). <sup>4</sup> Among those with evidence of ART at any time. <sup>5</sup> The week's total number of COVID-19 admissions relative to the maximum weekly COVID-19 admissions for that district (as a percent).  
ART: Antiretroviral therapy. CI: Confidence interval.

**Table B2: Mortality rates, unadjusted and adjusted odds ratios (and 95% CIs) describing the association of mortality with a person's demographic characteristics, co-existing conditions, vaccination status, HIV characteristics and time/location covariates, for adults with HIV and SARS-CoV-2 infections ≥ 40 years old in the Western Cape**

| Variable                                | Category     | n    | Mortality risk<br>(95% CI) | Univariable analysis: Unadjusted<br>odds ratio (uOR) |         | Multivariable analysis: Adjusted<br>odds ratio (aOR) |         |
|-----------------------------------------|--------------|------|----------------------------|------------------------------------------------------|---------|------------------------------------------------------|---------|
|                                         |              |      |                            | Estimate<br>(95% CI)                                 | p-value | Estimate<br>(95% CI)                                 | p-value |
| Sex                                     | Female (Ref) | 5529 | 7.23 (6.57,7.95)           | -                                                    | <0.001  |                                                      |         |
|                                         | Male         | 3146 | 11.09 (10.02,12.24)        | 1.60 (1.38,1.86)                                     |         | 1.31 (1.11,1.54)                                     | 0.002   |
| Age group (years)                       | 40-49 (Ref)  | 5207 | 5.36 (4.76,6.00)           | -                                                    | <0.001  |                                                      | <0.001  |
|                                         | 50-59        | 2560 | 10.35 (9.20,11.60)         | 2.04 (1.71,2.43)                                     |         | 1.73 (1.43,2.09)                                     |         |
|                                         | 60-69        | 711  | 20.68 (17.75,23.84)        | 4.60 (3.70,5.72)                                     |         | 3.34 (2.61,4.26)                                     |         |
|                                         | ≥ 70         | 197  | 29.44 (23.18,36.34)        | 7.37 (5.27,10.20)                                    |         | 4.89 (3.35,7.07)                                     |         |
| Hypertension                            | Absent (Ref) | 5796 | 6.82 (6.18,7.49)           | -                                                    | <0.001  |                                                      | 0.039   |
|                                         | Present      | 2879 | 12.30 (11.12,13.55)        | 1.92 (1.65,2.23)                                     |         | 1.22 (1.01,1.48)                                     |         |
| Diabetes                                | Absent (Ref) | 7298 | 6.48 (5.93,7.07)           | -                                                    | <0.001  |                                                      | <0.001  |
|                                         | Present      | 1377 | 20.04 (17.96,22.26)        | 3.62 (3.08,4.25)                                     |         | 3.12 (2.54,3.83)                                     |         |
| Chronic obstructive pulmonary disease   | Absent (Ref) | 7782 | 8.30 (7.70,8.94)           | -                                                    | 0.002   |                                                      | 0.744   |
|                                         | Present      | 893  | 11.53 (9.51,13.81)         | 1.44 (1.15,1.79)                                     |         | 1.04 (0.80,1.35)                                     |         |
| Chronic kidney disease                  | Absent (Ref) | 8098 | 7.42 (6.86,8.01)           | -                                                    | <0.001  |                                                      | <0.001  |
|                                         | Present      | 577  | 25.65 (22.13,29.42)        | 4.30 (3.50,5.27)                                     |         | 2.47 (1.89,3.21)                                     |         |
| Tuberculosis <sup>1</sup> (years since) | Absent (Ref) | 5799 | 7.23 (6.57,7.92)           | -                                                    | <0.001  |                                                      | <0.001  |
|                                         | ≥ 1          | 2284 | 8.89 (7.75,10.13)          | 1.25 (1.05,1.49)                                     |         | 1.26 (1.02,1.54)                                     |         |
|                                         | < 1          | 228  | 18.86 (14.00,24.55)        | 2.98 (2.09,4.18)                                     |         | 2.31 (1.54,3.42)                                     |         |
|                                         | Ongoing      | 364  | 23.08 (18.85,27.75)        | 3.85 (2.95,4.99)                                     |         | 3.37 (2.46,4.59)                                     |         |
| Number of conditions <sup>2</sup>       | 0-2 (Ref)    | 7994 | 7.36 (6.79,7.95)           | -                                                    | <0.001  |                                                      | 0.074   |
|                                         | >2           | 681  | 23.64 (20.50,27.02)        | 3.90 (3.20,4.73)                                     |         | 0.74 (0.53,1.03)                                     |         |
| Pregnancy                               | Absent (Ref) | 8625 | 8.66 (8.08,9.27)           | -                                                    | 0.195   |                                                      | 0.937   |
|                                         | Present      | 50   | 4.00 (0.49,13.71)          | 0.44 (0.07,1.42)                                     |         | 1.06 (0.17,3.51)                                     |         |

Continued on next page

Table B2 continued

| Variable                            | Category                | n    | Mortality risk<br>(95% CI) | Univariable analysis: Unadjusted odds ratio (uOR) |         | Multivariable analysis: Adjusted odds ratio (aOR) |         |
|-------------------------------------|-------------------------|------|----------------------------|---------------------------------------------------|---------|---------------------------------------------------|---------|
|                                     |                         |      |                            | Estimate<br>(95% CI)                              | p-value | Estimate<br>(95% CI)                              | p-value |
| Vaccination status <sup>3</sup>     | None (Ref)              | 8275 | 8.82 (8.22,9.45)           | -                                                 | 0.001   |                                                   | <0.001  |
|                                     | Early                   | 217  | 5.07 (2.56,8.89)           | 0.55 (0.28,0.97)                                  |         | 0.50 (0.25,0.92)                                  |         |
|                                     | Pfizer - 1 vaccine      | 79   | 8.86 (3.64,17.41)          | 1.00 (0.42,2.04)                                  |         | 0.40 (0.16,0.89)                                  |         |
|                                     | Primary                 | 104  | 0.96 (0.02,5.24)           | 0.10 (0.01,0.45)                                  |         | 0.10 (0.01,0.47)                                  |         |
| CD4 count (cells/μl)                | ≥ 500 (Ref)             | 974  | 7.80 (6.20,9.67)           | -                                                 | <0.001  |                                                   | <0.001  |
|                                     | 200-499                 | 998  | 10.12 (8.32,12.16)         | 1.33 (0.98,1.82)                                  |         | 1.20 (0.86,1.68)                                  |         |
|                                     | 50-199                  | 502  | 14.74 (11.76,18.15)        | 2.04 (1.45,2.87)                                  |         | 1.82 (1.25,2.66)                                  |         |
|                                     | 0-49                    | 184  | 24.46 (18.43,31.32)        | 3.83 (2.53,5.74)                                  |         | 3.30 (2.04,5.31)                                  |         |
|                                     | Unknown                 | 6017 | 7.53 (6.87,8.22)           | 0.96 (0.75,1.25)                                  |         | 0.94 (0.72,1.24)                                  |         |
| Viral load <sup>4</sup> (copies/ml) | 0-999 (Ref)             | 6112 | 7.66 (7.00,8.35)           | -                                                 | <0.001  |                                                   | 0.546   |
|                                     | ≥ 1000                  | 570  | 12.63 (10.02,15.64)        | 1.74 (1.33,2.26)                                  |         | 1.08 (0.78,1.47)                                  |         |
|                                     | Unknown                 | 1183 | 7.27 (5.86,8.90)           | 0.95 (0.74,1.19)                                  |         | 0.89 (0.68,1.15)                                  |         |
| ART collection                      | Yes                     | 7865 | 7.96 (7.37,8.58)           | -                                                 | <0.001  |                                                   | 0.006   |
|                                     | No ART                  | 810  | 15.19 (12.78,17.84)        | 2.07 (1.67,2.54)                                  |         | 1.48 (1.12,1.94)                                  |         |
| HIV (years since first evidence)    | ≥ 1 (Ref)               | 8164 | 8.06 (7.48,8.67)           | -                                                 | <0.001  |                                                   | 0.012   |
|                                     | < 1                     | 511  | 17.81 (14.59,21.41)        | 2.47 (1.93,3.13)                                  |         | 1.48 (1.08,2.01)                                  |         |
| Admission pressure <sup>5</sup> (%) | <25 (Ref)               | 2036 | 8.25 (7.09,9.53)           | -                                                 | 0.137   |                                                   | 0.932   |
|                                     | ≥25 and <50             | 3183 | 9.43 (8.43,10.49)          | 1.16 (0.95,1.41)                                  |         | 0.99 (0.78,1.27)                                  |         |
|                                     | ≥50                     | 3456 | 8.13 (7.24,9.09)           | 0.98 (0.81,1.20)                                  |         | 0.95 (0.72,1.26)                                  |         |
| Wave                                | Wave 1 (Ref)            | 2731 | 9.34 (8.27,10.49)          | -                                                 | 0.286   |                                                   | 0.104   |
|                                     | Wave 2                  | 2505 | 8.58 (7.51,9.75)           | 0.91 (0.75,1.10)                                  |         | 0.96 (0.74,1.25)                                  |         |
|                                     | Wave 3                  | 2672 | 8.35 (7.32,9.46)           | 0.88 (0.73,1.07)                                  |         | 1.14 (0.89,1.46)                                  |         |
|                                     | Inter-waves             | 767  | 7.30 (5.56,9.38)           | 0.76 (0.56,1.03)                                  |         | 0.74 (0.51,1.06)                                  |         |
| District                            | City of Cape Town (Ref) | 5447 | 9.42 (8.66,10.22)          | -                                                 | 0.002   |                                                   | 0.231   |
|                                     | Cape Winelands          | 941  | 9.03 (7.28,11.05)          | 0.96 (0.75,1.21)                                  |         | 0.97 (0.74,1.26)                                  |         |
|                                     | Central Karoo           | 121  | 8.26 (4.03,14.67)          | 0.87 (0.42,1.58)                                  |         | 0.75 (0.35,1.47)                                  |         |
|                                     | Garden Route            | 1388 | 6.56 (5.31,7.99)           | 0.67 (0.53,0.85)                                  |         | 0.82 (0.64,1.05)                                  |         |
|                                     | Overberg                | 368  | 5.71 (3.57,8.59)           | 0.58 (0.36,0.89)                                  |         | 0.65 (0.39,1.03)                                  |         |
|                                     | West Coast              | 410  | 7.07 (4.79,10.00)          | 0.73 (0.49,1.06)                                  |         | 0.77 (0.50,1.14)                                  |         |

<sup>1</sup> Time since the most recent evidence of a start of an episode; with episodes beginning after 2 months before the SARS-CoV-2 diagnosis considered as ongoing. <sup>2</sup> Hypertension, diabetes, chronic obstructive pulmonary disease, chronic kidney disease, tuberculosis (at any time). <sup>3</sup> The highest level of protection from among: No vaccine received ('None'); <28 days since a first vaccine dose ('Early'); ≥28 days since 1 dose of a Pfizer vaccine ('1 vaccine (P)'); ≥28 days since 1 Janssen vaccine, possibly with a 2nd vaccine too, or ≥14 days since a 2nd Pfizer vaccine ((combined into the 'primary' series due to the small sample). <sup>4</sup> Among those with evidence of ART at any time. <sup>5</sup> The week's total number of COVID-19 admissions relative to the maximum weekly COVID-19 admissions for that district (as a percent). ART: Antiretroviral therapy. CI: Confidence interval.

## Supplemental Digital Content C: Adjusted odds ratios using alternative CD4 cell counts measures

**Table C1: Adjusted odds ratios (and 95% CIs) describing the association of mortality with a person's demographic characteristics, co-existing conditions, vaccination status, HIV characteristics and time/location covariates, using alternative CD4 cell count measures for 15–39-year-old adults with HIV and SARS-CoV-2 infections in the Western Cape**

| Variable                                | Category     | Adjusted odds ratio (aOR)                           |                                      |                                             |
|-----------------------------------------|--------------|-----------------------------------------------------|--------------------------------------|---------------------------------------------|
|                                         |              | Model 1:<br>Recent CD4<br>(AIC <sup>6</sup> : 2051) | Model 2:<br>CD4 nadir<br>(AIC: 2043) | Model 3:<br>CD4 at ART start<br>(AIC: 2062) |
| Sex                                     | Female (Ref) |                                                     |                                      |                                             |
|                                         | Male         | 1.07 (0.80,1.42)                                    | 1.04 (0.78,1.39)                     | 1.09 (0.81,1.45)                            |
| Age group (years)                       | 15-24 (Ref)  |                                                     |                                      |                                             |
|                                         | 25-29        | 1.21 (0.70,2.17)                                    | 1.15 (0.66,2.06)                     | 1.14 (0.66,2.03)                            |
|                                         | 30-34        | 1.37 (0.83,2.38)                                    | 1.30 (0.78,2.24)                     | 1.28 (0.78,2.22)                            |
|                                         | 35-39        | 2.05 (1.25,3.51)                                    | 1.88 (1.15,3.21)                     | 1.91 (1.17,3.27)                            |
| Hypertension                            | Absent (Ref) |                                                     |                                      |                                             |
|                                         | Present      | 1.68 (1.07,2.55)                                    | 1.70 (1.08,2.59)                     | 1.67 (1.06,2.53)                            |
| Diabetes                                | Absent (Ref) |                                                     |                                      |                                             |
|                                         | Present      | 2.64 (1.54,4.33)                                    | 2.56 (1.49,4.20)                     | 2.46 (1.44,4.01)                            |
| Chronic obstructive pulmonary disease   | Absent (Ref) |                                                     |                                      |                                             |
|                                         | Present      | 1.15 (0.62,1.98)                                    | 1.14 (0.62,1.97)                     | 1.18 (0.64,2.03)                            |
| Chronic kidney disease                  | Absent (Ref) |                                                     |                                      |                                             |
|                                         | Present      | 5.85 (2.93,11.06)                                   | 5.99 (3.01,11.31)                    | 5.79 (2.90,10.95)                           |
| Tuberculosis <sup>1</sup> (years since) | Absent (Ref) |                                                     |                                      |                                             |
|                                         | ≥ 1          | 1.73 (1.19,2.49)                                    | 1.50 (1.01,2.20)                     | 1.67 (1.14,2.42)                            |
|                                         | < 1          | 5.40 (3.43,8.41)                                    | 5.81 (3.71,8.99)                     | 7.48 (4.88,11.30)                           |
| Number of conditions <sup>2</sup>       | Ongoing      | 7.40 (5.12,10.67)                                   | 7.58 (5.24,10.96)                    | 8.66 (6.06,12.36)                           |
|                                         | 0-2 (Ref)    |                                                     |                                      |                                             |
|                                         | >2           | 0.62 (0.22,1.60)                                    | 0.61 (0.22,1.58)                     | 0.64 (0.23,1.65)                            |
| Pregnancy                               | Absent (Ref) |                                                     |                                      |                                             |
|                                         | Present      | 0.94 (0.51,1.63)                                    | 0.95 (0.51,1.64)                     | 0.98 (0.53,1.68)                            |
| Vaccination status <sup>3</sup>         | None (Ref)   |                                                     |                                      |                                             |
|                                         | Early        | 1.31 (0.31,3.80)                                    | 1.29 (0.30,3.71)                     | 1.18 (0.28,3.46)                            |
|                                         | 1/2 vaccines | 0.00 (0.00,0.29)                                    | 0.00 (0.00,0.00)                     | 0.00 (0.00,0.00)                            |
| CD4 count (cells/μl)                    | ≥ 500 (Ref)  |                                                     |                                      |                                             |
|                                         | 200-499      | 1.19 (0.67,2.17)                                    | 1.08 (0.67,1.84)                     | 0.90 (0.55,1.52)                            |
|                                         | 50-199       | 2.20 (1.23,4.04)                                    | 1.29 (0.76,2.25)                     | 1.41 (0.84,2.43)                            |
|                                         | 0-49         | 3.39 (1.83,6.47)                                    | 3.36 (1.95,5.98)                     | 1.60 (0.84,3.05)                            |
|                                         | Unknown      | 1.05 (0.64,1.80)                                    | 1.16 (0.63,2.17)                     | 0.63 (0.37,1.11)                            |
| Viral load <sup>4</sup> (copies/ml)     | 0-999 (Ref)  |                                                     |                                      |                                             |
|                                         | ≥ 1000       | 1.53 (1.03,2.24)                                    | 1.68 (1.15,2.43)                     | 2.11 (1.46,3.02)                            |
|                                         | Unknown      | 1.26 (0.88,1.81)                                    | 1.35 (0.94,1.93)                     | 1.43 (1.00,2.04)                            |
| ART collection                          | Yes          |                                                     |                                      |                                             |
|                                         | No ART       | 2.30 (1.47,3.54)                                    | 2.33 (1.45,3.66)                     | 3.32 (1.97,5.62)                            |
| HIV (years since first evidence)        | ≥ 1 (Ref)    |                                                     |                                      |                                             |
|                                         | < 1          | 1.37 (0.91,2.05)                                    | 1.48 (0.96,2.24)                     | 1.33 (0.88,1.99)                            |

Continued on next page

Table C1 continued

| Variable                            | Category                | Adjusted odds ratio (aOR)                           |                                      |                                             |
|-------------------------------------|-------------------------|-----------------------------------------------------|--------------------------------------|---------------------------------------------|
|                                     |                         | Model 1:<br>Recent CD4<br>(AIC <sup>6</sup> : 2051) | Model 2:<br>CD4 nadir<br>(AIC: 2043) | Model 3:<br>CD4 at ART start<br>(AIC: 2062) |
| Admission pressure <sup>5</sup> (%) | <25 (Ref)               |                                                     |                                      |                                             |
|                                     | ≥25 and <50             | 1.65 (1.11,2.49)                                    | 1.68 (1.13,2.53)                     | 1.66 (1.12,2.51)                            |
|                                     | ≥50                     | 1.24 (0.79,2.00)                                    | 1.30 (0.82,2.09)                     | 1.25 (0.80,2.01)                            |
| Wave                                | Wave 1 (Ref)            |                                                     |                                      |                                             |
|                                     | Wave 2                  | 1.29 (0.82,2.01)                                    | 1.27 (0.81,1.99)                     | 1.31 (0.83,2.04)                            |
|                                     | Wave 3                  | 1.68 (1.13,2.50)                                    | 1.71 (1.15,2.54)                     | 1.66 (1.11,2.47)                            |
|                                     | Inter-waves             | 1.83 (1.08,3.11)                                    | 1.81 (1.07,3.07)                     | 1.88 (1.11,3.19)                            |
| District                            | City of Cape Town (Ref) |                                                     |                                      |                                             |
|                                     | Cape Winelands          | 1.70 (1.12,2.52)                                    | 1.70 (1.12,2.54)                     | 1.71 (1.12,2.54)                            |
|                                     | Central Karoo           | 0.50 (0.08,1.75)                                    | 0.55 (0.09,1.88)                     | 0.51 (0.08,1.77)                            |
|                                     | Garden Route            | 0.95 (0.64,1.37)                                    | 0.94 (0.64,1.37)                     | 0.96 (0.65,1.39)                            |
|                                     | Overberg                | 1.37 (0.76,2.32)                                    | 1.38 (0.77,2.34)                     | 1.31 (0.73,2.21)                            |
|                                     | West Coast              | 0.94 (0.45,1.75)                                    | 0.93 (0.45,1.73)                     | 0.96 (0.46,1.80)                            |

<sup>1</sup> Time since the most recent evidence of a start of an episode; with episodes beginning after 2 months before the SARS-CoV-2 diagnosis considered as ongoing. <sup>2</sup> Hypertension, diabetes, chronic obstructive pulmonary disease, chronic kidney disease, tuberculosis (at any time). <sup>3</sup> The highest level of protection from among: No vaccine received ('None'); <28 days since a first vaccine dose ('Early'); ≥28 days since (at least) a first dose of a vaccine (1 or 2 Pfizer or Janssen vaccines not distinguished due to small samples). <sup>4</sup> Among those with evidence of ART at any time. <sup>5</sup> The week's total number of COVID-19 admissions relative to the maximum weekly COVID-19 admissions for that district (as a percent). <sup>6</sup> Akaike Information Criterion (AIC) provides relative measure of models' predictive powers; lower AIC values are more favourable.

ART: Antiretroviral therapy. CI: Confidence interval.



**Table C2: Adjusted odds ratios (and 95% CIs) describing the association of mortality with a person's demographic characteristics, co-existing conditions, vaccination status, HIV characteristics and time/location covariates, using alternative CD4 cell count measures, for adults with HIV and SARS-CoV-2 infections  $\geq$  40 years old in the Western Cape**

| Variable                                | Category           | Adjusted odds ratio (aOR)                           |                                      |                                             |
|-----------------------------------------|--------------------|-----------------------------------------------------|--------------------------------------|---------------------------------------------|
|                                         |                    | Model 1:<br>Recent CD4<br>(AIC <sup>6</sup> : 4465) | Model 2:<br>CD4 nadir<br>(AIC: 4470) | Model 3:<br>CD4 at ART start<br>(AIC: 4489) |
| Sex                                     | Female (Ref)       |                                                     |                                      |                                             |
|                                         | Male               | 1.31 (1.11,1.54)                                    | 1.30 (1.10,1.53)                     | 1.33 (1.13,1.57)                            |
| Age group (years)                       | 40-49 (Ref)        |                                                     |                                      |                                             |
|                                         | 50-59              | 1.73 (1.43,2.09)                                    | 1.71 (1.42,2.06)                     | 1.67 (1.39,2.02)                            |
|                                         | 60-69              | 3.34 (2.61,4.26)                                    | 3.44 (2.68,4.39)                     | 3.27 (2.56,4.17)                            |
|                                         | 70+                | 4.89 (3.35,7.07)                                    | 4.99 (3.41,7.24)                     | 4.62 (3.16,6.68)                            |
| Hypertension                            | Absent (Ref)       |                                                     |                                      |                                             |
|                                         | Present            | 1.22 (1.01,1.48)                                    | 1.23 (1.02,1.49)                     | 1.22 (1.01,1.48)                            |
| Diabetes                                | Absent (Ref)       |                                                     |                                      |                                             |
|                                         | Present            | 3.12 (2.54,3.83)                                    | 3.14 (2.56,3.86)                     | 3.04 (2.48,3.73)                            |
| Chronic obstructive pulmonary disease   | Absent (Ref)       |                                                     |                                      |                                             |
|                                         | Present            | 1.04 (0.80,1.35)                                    | 1.09 (0.84,1.41)                     | 1.09 (0.84,1.41)                            |
| Chronic kidney disease                  | Absent (Ref)       |                                                     |                                      |                                             |
|                                         | Present            | 2.47 (1.89,3.21)                                    | 2.49 (1.91,3.23)                     | 2.52 (1.93,3.27)                            |
| Tuberculosis <sup>1</sup> (years since) | Absent (Ref)       |                                                     |                                      |                                             |
|                                         | 12m+               | 1.26 (1.02,1.54)                                    | 1.18 (0.96,1.45)                     | 1.24 (1.01,1.52)                            |
|                                         | <12m               | 2.31 (1.54,3.42)                                    | 2.68 (1.80,3.93)                     | 2.93 (1.96,4.28)                            |
|                                         | Ongoing            | 3.37 (2.46,4.59)                                    | 3.66 (2.69,4.96)                     | 4.07 (2.99,5.49)                            |
| Number of conditions <sup>2</sup>       | 0-2 (Ref)          |                                                     |                                      |                                             |
|                                         | >2                 | 0.74 (0.53,1.03)                                    | 0.75 (0.54,1.04)                     | 0.75 (0.54,1.04)                            |
| Pregnancy                               | Absent (Ref)       |                                                     |                                      |                                             |
|                                         | Present            | 1.06 (0.17,3.51)                                    | 1.14 (0.18,3.74)                     | 1.11 (0.18,3.65)                            |
| Vaccination status <sup>3</sup>         | None (Ref)         |                                                     |                                      |                                             |
|                                         | Early              | 0.50 (0.25,0.92)                                    | 0.49 (0.24,0.90)                     | 0.49 (0.24,0.90)                            |
|                                         | Pfizer - 1 vaccine | 0.40 (0.16,0.89)                                    | 0.41 (0.16,0.89)                     | 0.41 (0.16,0.90)                            |
|                                         | Primary            | 0.10 (0.01,0.47)                                    | 0.10 (0.01,0.48)                     | 0.09 (0.01,0.44)                            |
| CD4 count (cells/ $\mu$ l)              | $\geq$ 500 (Ref)   |                                                     |                                      |                                             |
|                                         | 200-499            | 1.20 (0.86,1.68)                                    | 1.37 (1.02,1.86)                     | 1.07 (0.74,1.57)                            |
|                                         | 50-199             | 1.82 (1.25,2.66)                                    | 1.50 (1.11,2.07)                     | 1.37 (0.95,2.01)                            |
|                                         | 0-49               | 3.30 (2.04,5.31)                                    | 2.36 (1.65,3.38)                     | 2.11 (1.36,3.32)                            |
|                                         | Unknown            | 0.94 (0.72,1.24)                                    | 0.79 (0.53,1.19)                     | 1.21 (0.85,1.76)                            |
| Viral load <sup>4</sup> (copies/ml)     | 0-999 (Ref)        |                                                     |                                      |                                             |
|                                         | $\geq$ 1000        | 1.08 (0.78,1.47)                                    | 1.34 (0.99,1.79)                     | 1.45 (1.08,1.93)                            |
|                                         | Unknown            | 0.89 (0.68,1.15)                                    | 1.03 (0.79,1.34)                     | 0.94 (0.73,1.21)                            |
| ART collection                          | Yes                |                                                     |                                      |                                             |
|                                         | No ART             | 1.48 (1.12,1.94)                                    | 1.80 (1.32,2.43)                     | 1.40 (1.03,1.88)                            |
| HIV (years since first evidence)        | $\geq$ 1 (Ref)     |                                                     |                                      |                                             |
|                                         | < 1                | 1.48 (1.08,2.01)                                    | 1.87 (1.35,2.57)                     | 1.57 (1.15,2.14)                            |

Continued on next page

Table C2 continued

| Variable                            | Category                | Adjusted odds ratio (aOR)                           |                                      |                                             |
|-------------------------------------|-------------------------|-----------------------------------------------------|--------------------------------------|---------------------------------------------|
|                                     |                         | Model 1:<br>Recent CD4<br>(AIC <sup>6</sup> : 4465) | Model 2:<br>CD4 nadir<br>(AIC: 4470) | Model 3:<br>CD4 at ART start<br>(AIC: 4489) |
| Admission pressure <sup>5</sup> (%) | <25 (Ref)               |                                                     |                                      |                                             |
|                                     | ≥25 and <50             | 0.99 (0.78,1.27)                                    | 0.98 (0.77,1.26)                     | 1.00 (0.78,1.28)                            |
|                                     | ≥50                     | 0.95 (0.72,1.26)                                    | 0.95 (0.72,1.26)                     | 0.95 (0.72,1.26)                            |
| Wave                                | Wave 1 (Ref)            |                                                     |                                      |                                             |
|                                     | Wave 2                  | 0.96 (0.74,1.25)                                    | 0.97 (0.74,1.26)                     | 0.98 (0.75,1.27)                            |
|                                     | Wave 3                  | 1.14 (0.89,1.46)                                    | 1.15 (0.90,1.48)                     | 1.18 (0.91,1.51)                            |
|                                     | Inter-waves             | 0.74 (0.51,1.06)                                    | 0.72 (0.50,1.04)                     | 0.75 (0.52,1.09)                            |
| District                            | City of Cape Town (Ref) |                                                     |                                      |                                             |
|                                     | Cape Winelands          | 0.97 (0.74,1.26)                                    | 1.01 (0.77,1.31)                     | 1.00 (0.76,1.30)                            |
|                                     | Central Karoo           | 0.75 (0.35,1.47)                                    | 0.81 (0.37,1.57)                     | 0.79 (0.36,1.54)                            |
|                                     | Garden Route            | 0.82 (0.64,1.05)                                    | 0.84 (0.65,1.07)                     | 0.82 (0.64,1.05)                            |
|                                     | Overberg                | 0.65 (0.39,1.03)                                    | 0.66 (0.40,1.05)                     | 0.67 (0.40,1.06)                            |
|                                     | West Coast              | 0.77 (0.50,1.14)                                    | 0.79 (0.52,1.18)                     | 0.80 (0.52,1.18)                            |

<sup>1</sup> Time since the most recent evidence of a start of an episode; with episodes beginning after 2 months before the SARS-CoV-2 diagnosis considered as ongoing. <sup>2</sup> Hypertension, diabetes, chronic obstructive pulmonary disease, chronic kidney disease, tuberculosis (at any time). <sup>3</sup> The highest level of protection from among: No vaccine received ('None'); <28 days since a first vaccine dose ('Early'); ≥28 days since 1 dose of a Pfizer vaccine ('1 vaccine (P)'); ≥28 days since 1 Janssen vaccine, possibly with a 2nd vaccine too, or ≥14 days since a 2nd Pfizer vaccine |(combined into the 'primary' series due to the small sample). <sup>4</sup> Among those with evidence of ART at any time. <sup>5</sup> The week's total number of COVID-19 admissions relative to the maximum weekly COVID-19 admissions for that district (as a percent). <sup>6</sup> Akaike Information Criterion (AIC) provides relative measure of models' predictive powers; lower AIC values are more favourable. ART: Antiretroviral therapy. CI: Confidence interval.

## Supplemental Digital Content D: Adjusted odds ratios for models including SARS-CoV-2 infections diagnosed during Wave 4

**Figure D1: Adjusted odds ratios (and 95% CIs) describing the association of mortality with a person's HIV characteristics, vaccination, demographic characteristics, and co-existing conditions, for 15–39-year-old adults with HIV and SARS-CoV-2 infections in the Western Cape using all infections until 10 March 2022. P-values are reported on the right.**

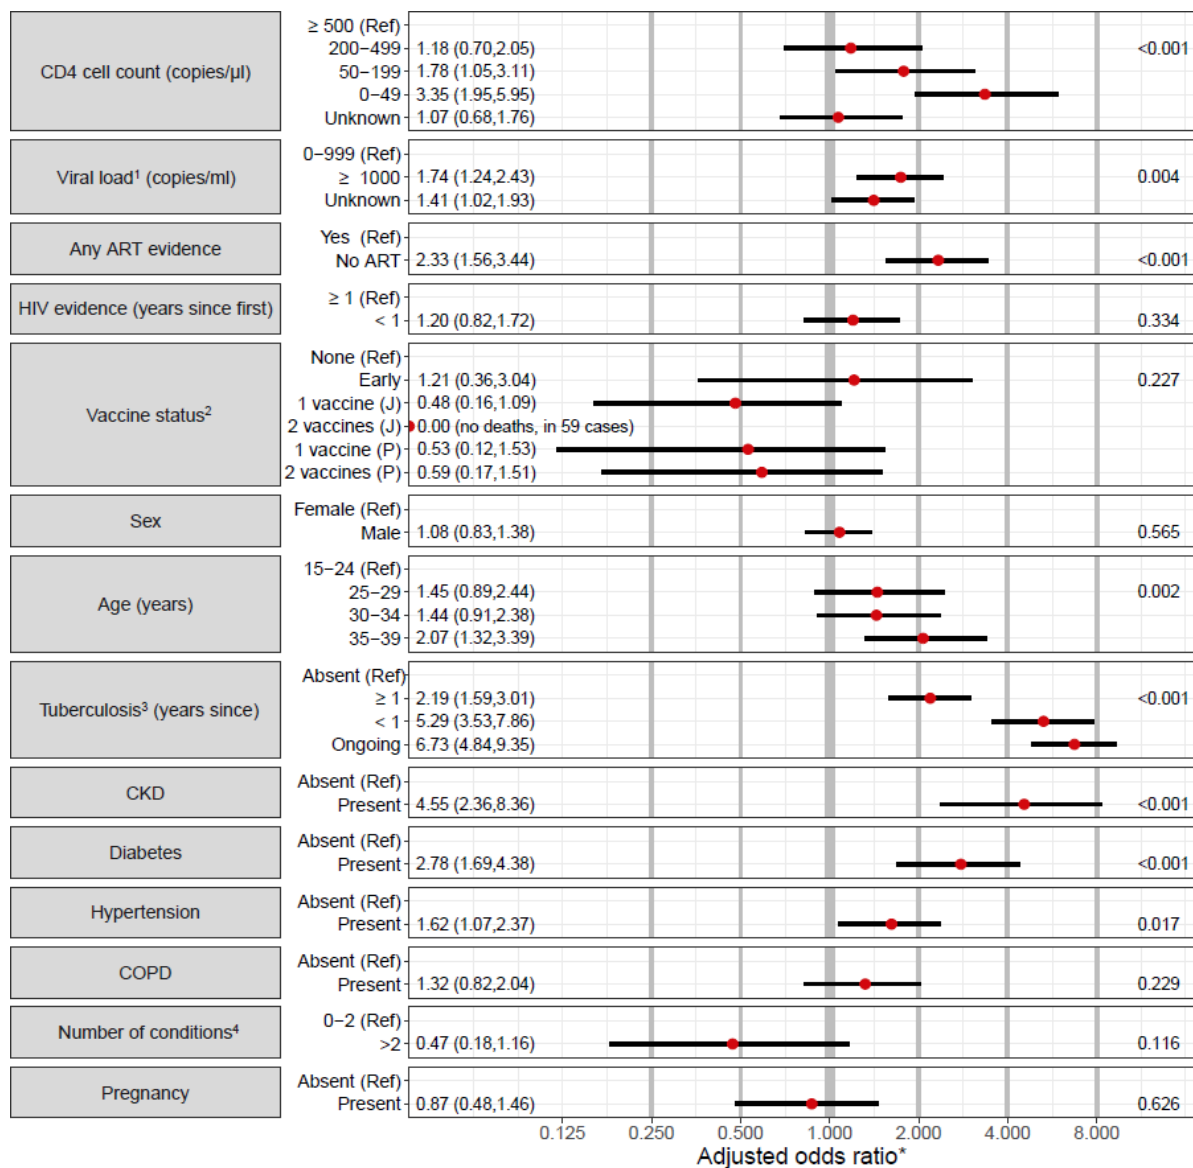

\* Also adjusted for district, wave, admission pressure

<sup>1</sup> Among those with evidence of ART at any time. <sup>2</sup> The highest level of protection from among six categories: No vaccine received ('None'); <28 days since a first vaccine dose ('Early'); ≥28 days since a first dose of a vaccine, by type ('1 vaccine'); or ≥14 days since a second dose, by type ('2 vaccines'). J: Janssen, P: Pfizer. <sup>3</sup> Time since the most recent evidence of a start of an episode; with episodes beginning after 2 months before the SARS-CoV-2 diagnosis considered as ongoing. <sup>4</sup> Hypertension, diabetes, chronic obstructive pulmonary disease, chronic kidney disease, tuberculosis (at any time).

ART: Antiretroviral therapy. CI: Confidence interval. CKD: Chronic kidney disease. COPD: Chronic obstructive pulmonary disease.

**Figure D2: Adjusted odds ratios (and 95% CIs) describing the association of mortality with a person’s HIV characteristics, vaccination, demographic characteristics, and co-existing conditions, for adults with HIV and SARS-CoV-2 infections aged ≥ 40 years in the Western Cape using all infections until 10 March 2022. P-values are reported on the right.**

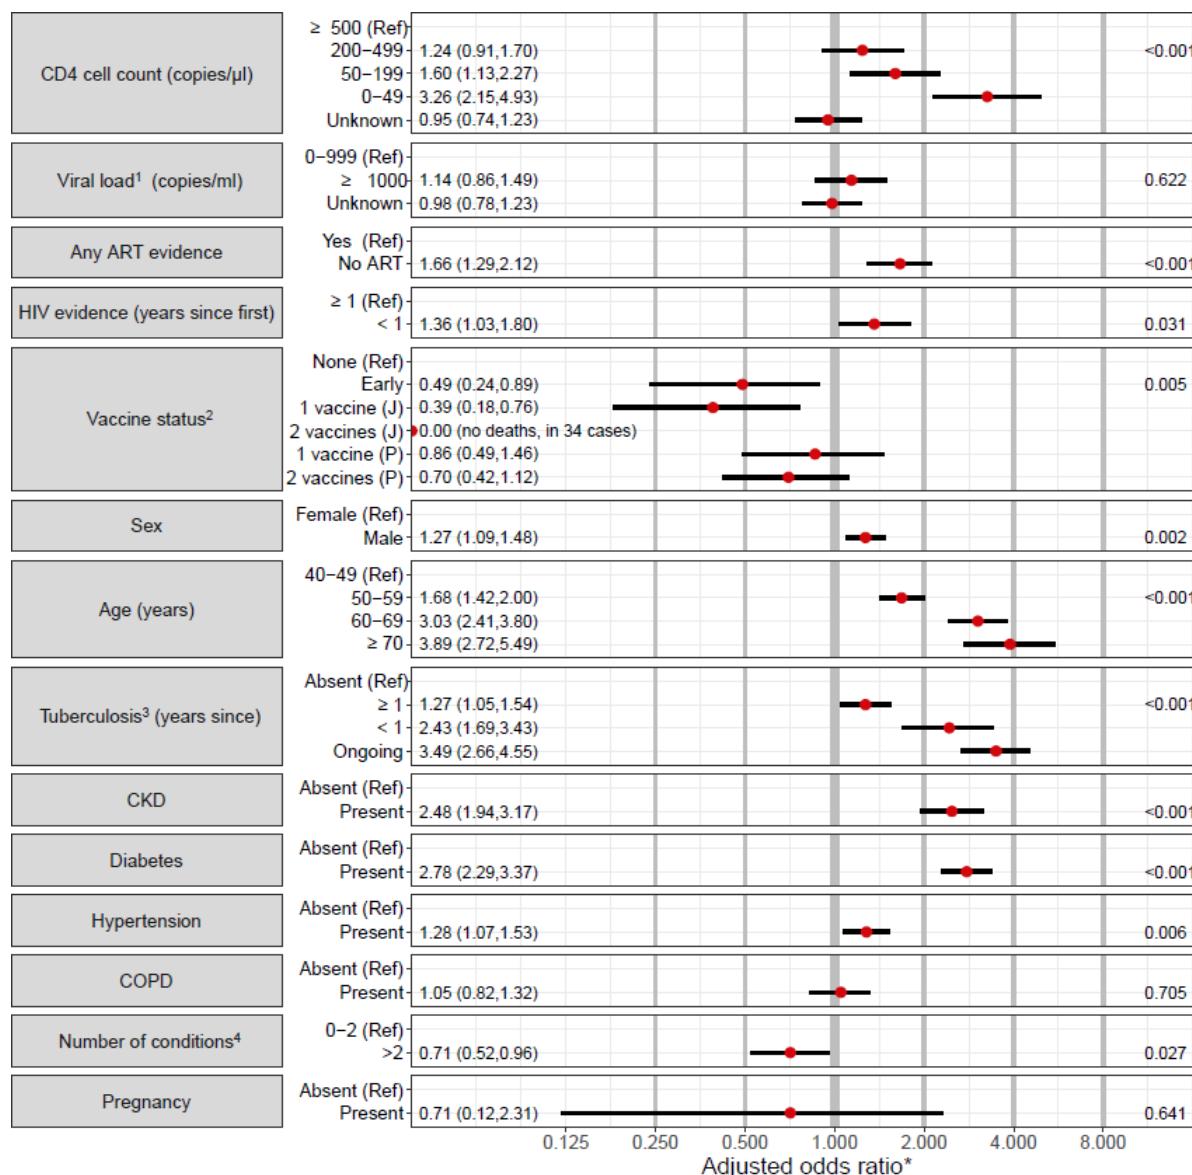

\* Also adjusted for district, wave, admission pressure.

<sup>1</sup> Among those with evidence of ART at any time. <sup>2</sup> The highest level of protection from among six categories: No vaccine received ('None'); <28 days since a first vaccine dose ('Early'); ≥28 days since a first dose of a vaccine, by type ('1 vaccine'); or ≥14 days since a second dose, by type ('2 vaccines'). J: Janssen, P: Pfizer. <sup>3</sup> Time since the most recent evidence of a start of an episode; with episodes beginning after 2 months before the SARS-CoV-2 diagnosis considered as ongoing. <sup>4</sup> Hypertension, diabetes, chronic obstructive pulmonary disease, chronic kidney disease, tuberculosis (at any time).

ART: Antiretroviral therapy. CI: Confidence interval. CKD: Chronic kidney disease. COPD: Chronic obstructive pulmonary disease.
